# Supplementary material for: 2D Seismic Imaging of the Koillismaa Layered Igneous Complex, North-Eastern Finland
Source: Copernicus journal article supplement (doi:10.5194/egusphere-2025-496), 2025-03-06

## Comparison of curvelet filtering on migration results

### Pre-stack Migration

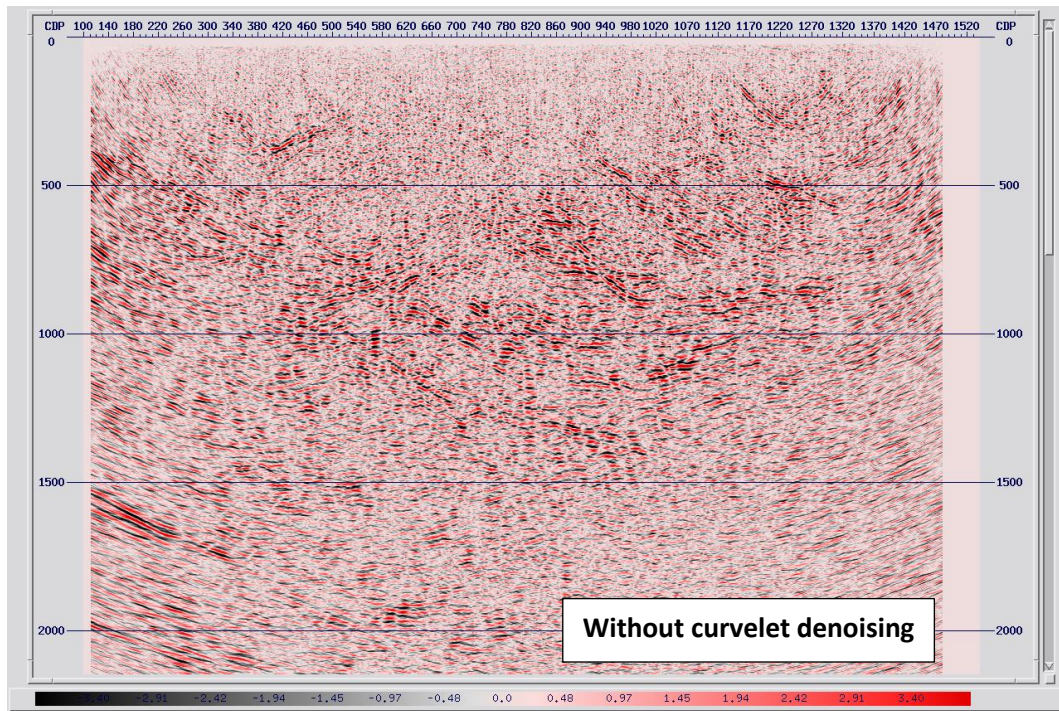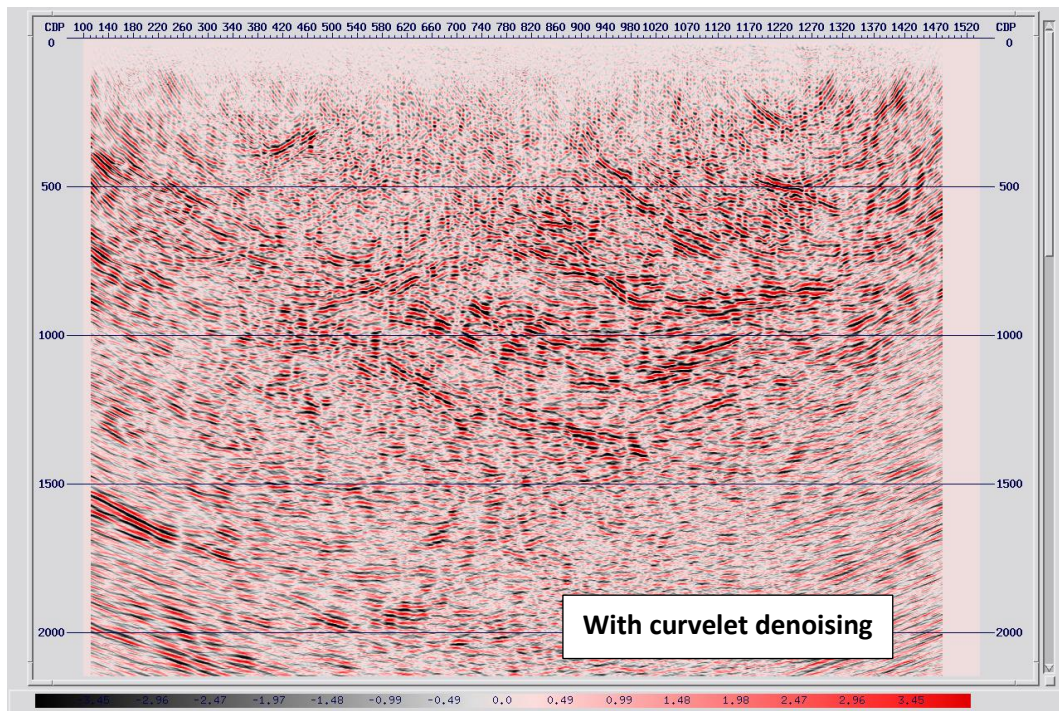



**Post-stack Migration**

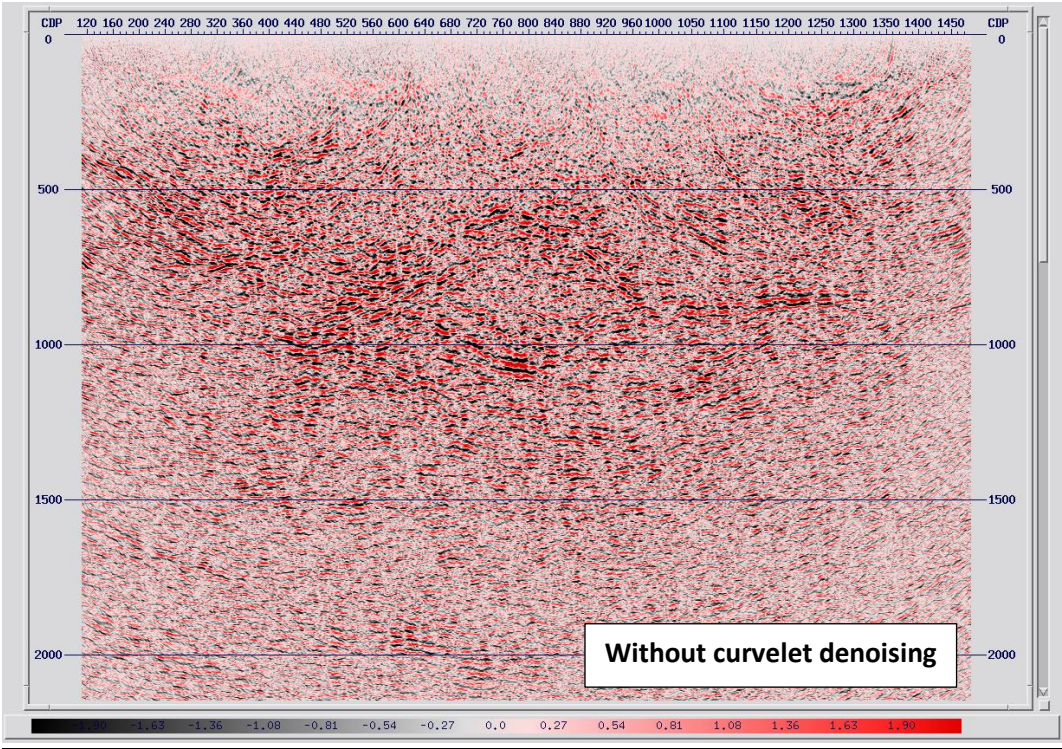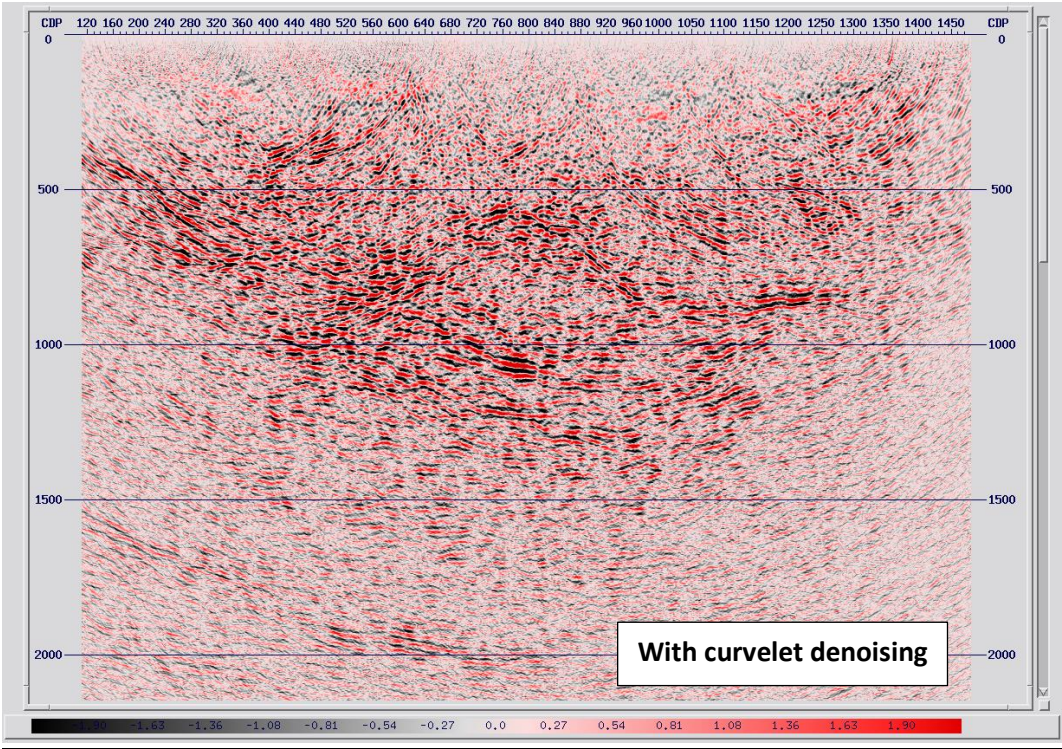

Supplement: Supplementary file [file egusphere-2025-496-AC1-supplement.pdf]
